# Supplementary material
Source: publisher figshare collection journal article supplement (https://geolsoc.figshare.com/ndownloader/files/31670232)
Supplement: Supplementary file 1 [file 31670232]

## Sheet: Sheet2
Supplementary Table 3. Hygrophytic (h) and xerophytic (x) pollen and spore genera in this study.
Taxa	Visscher and Van der Zwan, 1981	Visscher et al., 1994	Roghi, 2004	Galfetti et al., 2007	Roghi et al., 2010	Hochuli and Vigran, 2010	Kustatscher et al., 2012	Mueller et al., 2016a	Mueller et al., 2016b	Baranyi et al., 2019	Fijałkowska-Mader et al., 2021	This paper
Abietineaepollenites			x	x	x	x						x
Abnormal pollen					x							x
Acantotriletes	h		h	h	h	h					h	h
Anapiculatisporites	h	h	h	h	h	h	h			h	h	h
Annulispora	h	h	h	h	h	h		h	h		h	h
Apiculatisporis	h		h	h	h	h					h	h
Aratrisporites	h	h	h	h	h	h	h	h	h		h	h
Baculatisporites	h			h	h	h		h	h		h	h
Calamospora	h	h	h	h	h	h		h	h	h	h	h
Camarozonotriletes	h		h	h	h	h		h	h		h	h
Chasmatosporites		h		h	h	h		h
Conbaculatisporites	h			h	h	h		h	h	h	h	h
Concavisporites	h	h	h	h	h	h	h	h	h	h	h	h
Converrucosisporites	h			h	h	h				h	h	h
Cyathidites	h	h		h	h	h					h	h
Cycadopites	h	h		h	h	h		h	h	h
Cyclogranulatisporites	h	h		h	h	h				h		h
Densosisporites	h			h	h	h						h
Dictyophyllidites	h	h	h	h	h	h				h		h
Granulatisporites	h			h	h	h						h
Hamiapollenites	x	x	x	x	x	x						x
Kraeuselisporites	h	h	h	h	h	h	h	h	h	h	h	h
Leiotriletes	h	h		h	h	h						h
Limatulasporites	h			h	h	h						h
Lophotriletes	h		h	h	h	h					h	h
Lunatisporites	x	x	x	x	x	x		x	x	x	x	x
Lundbladispora	h			h	h							h
Lycopodiacidites	h	h	h	h	h	h			h	h	h	h
Monosulcites	h	h		h	h
Neoraistrickia	h			h	h	h						h
Nevesisporites	h			h	h	h					h	h
Osmundacidites	h	h		h	h	h	h			h	h	h
Pinuspollenites			x	x	x	x						x
Podocarpidites			x	x	x	x						x
Polycingulatisporites	h			h	h	h					h	h
Protoconiferus					x							x
Protopinus					x							x
Punctatisporites	h		h	h	h	h	h	h	h		h	h
Quadraeculina					x			x				x
Retusotriletes	h			h	h	h	h					h
Rugulatisporites	h			h	h	h						h
Stereisporites	h			h	h	h						h
Striatella	h	h	h	h	h	h		h	h			h
Striatoabietites	x	x	x	x	x	x	x	x	x		x	x
Striatopodocarpites	x	x	x	x	x	x						x
Tigrisporites	h			h	h	h						h
Todisporites	h	h		h	h	h				h	h	h
Verrucosisporites	h	h		h	h	h			h	h	h	h
Vittatina	x	x	x	x	x	x						x
Zebrasporites	h			h	h	h		h			h	h
*Blanks represent unknown or uncertain hygro-/xerophytic affinities.
References
Baranyi, W., Rostási, Á., Raucsik, B. and Kürschner, W.M. 2019. Palynological and weathering proxies reveal climatic fluctuations during the Carnian Pluvial Episode (CPE) (Late Triassic) from marine succession in the Transdanubian Range (western Hungary). Global Planetary Change, 177, 157–172.
Fijałkowska-Mader, A., Jewuła, K. and Bodor, E. 2021. Record of the Carnian Pluvial Episode in the Polish microflora. Palaeoworld, 30, 106–125, https://doi.org/10.1016/j.palwor.2020.03.006
Galfetii, T., Hochuli, P.A., Brayard, A., Bucher, H., Weissert, H. and Vigran, J.O. 2007. Smithian–Spathian boundary event: Evidence for global climatic change in the wake of the end-Permian crisis. Geology, 35, 291–294.
Hochuli, P.A. and Vigran, J.O. 2010. Climate variations in the Boreal Triassic – inferred from palynological records from the Barents Sea. Palaeogeography, Palaeoclimatology, Palaeoecology, 290, 20–42.
Kustatscher, E., Heunisch, C. and Van Konijnenburg-Van Cittert, J.H.A. 2012. Taphonomical implication of the Ladinian megaflora and palynoflora of the Thale (Germany). Palaios, 27, 753–764.
Mueller, S., Hounslow, M.W. and Kürschner, W.M. 2016a. Integrated stratigraphy and palaeoclimate history of the Carnian Pluvial Event in the Boreal realm; new data from the Upper Triassic Kapp Toscana Group in central Spitsbergen (Norway). Journal of the Geological Society, 173, 186–202.
Mueller, S., Krystyn, L. and Kürschner, W.M. 2016b. Climate variability during the Carnian Pluvial Phase — a quantitative palynological study of the Carnian sedimentary succession at Lunz am See, Northern Calcareous Alps, Austria. Palaeogeography, Palaeoclimatology, Palaeoecology, 441, 198–211.
Roghi, G. 2004. Palynological investigations in the Carnian of the Cave del Predil area (Julian Alps, NE Italy). Review of Palaeobotany and Palynology, 132, 1–35.
Roghi, G., Gianolla, P., Minarelli, L., Pilati, C. and Preto, N. 2010. Palynological correlation of Carnian humid pulses throughout western Tethys. Palaeogeography, Palaeoclimatology, Palaeoecology, 290, 89–106.
Visscher, H. and Van der Zwan, C.J. 1981. Palynology of the Circum-Mediterranean Triassic: phytogeographical and palaeoclimatological implications. Geologische Rundschau, 70, 625–634.
Visscher, H., Van Houte, M, Brugman, W.A. and Poort, R.J. 1994. Rejection of a Carnian (Late Triassic) "pluvial event" in Europe. Review of Palaeobotany and Palynology, 83, 217–226.
